# Supplementary material for: Visualization of latent fingerprints using a simple “silver imaging ink”
Source: Royal Society of Chemistry journal article supplement (doi:10.1039/c6ay01811d), 2016-01-01
Supplement: c6ay01811d1.pdf [file c6ay01811d1.pdf]

# Supplementary Information

## Visualization of latent fingerprints by using a simple “silver imaging ink”

Yaomin Yang,<sup>a</sup> Xiaojuan Liu,<sup>b,\*</sup> Yingying Lu,<sup>b</sup> Lin Tang,<sup>b</sup> Jinfang Zhang<sup>b</sup>, Lei Ge,<sup>b,\*</sup>  
and Feng Li<sup>b,\*</sup>

<sup>a</sup> National Deep Sea Center, Qingdao, Shandong, 266237, People’s Republic of China

<sup>b</sup> College of Chemistry and Pharmaceutical Sciences, Qingdao Agricultural University,  
Qingdao 266109, People’s Republic of China

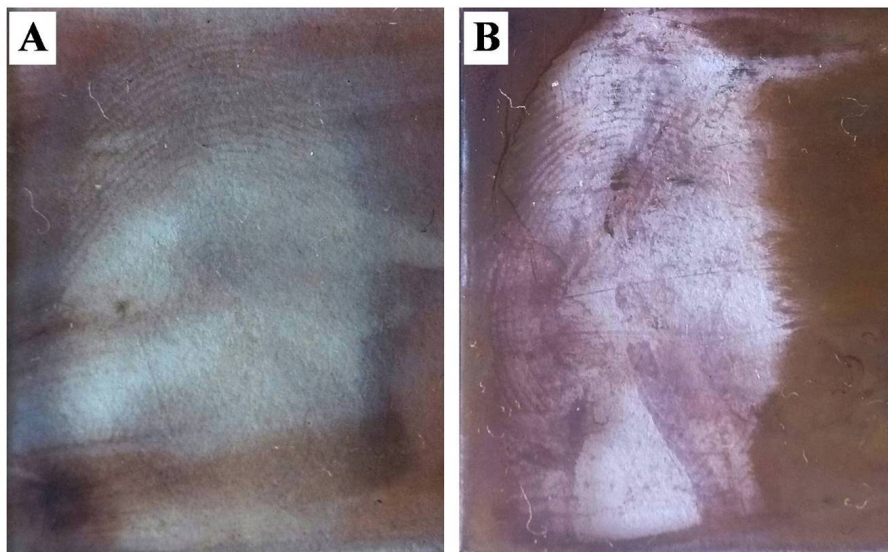

**Fig. S1** Photographs of LFPs developed by the traditional Tollens process after reaction of (A) 6 min and (B) 12 min.
